# Supplementary material for: The Effects of Apolipoprotein F Deficiency on High Density Lipoprotein Cholesterol Metabolism in Mice
Source: PubMed Central journal article supplement (PMC3282742; doi:10.1371/journal.pone.0031616), 2012-02-20
Supplement: pone.0031616.s003.pdf [file pone.0031616.s003.pdf]

**Supplementary Table S2-** Threshold Cycles for ApoF and Beta Actin in female wild type mice. One microgram of RNA was reverse transcribed to cDNA in a final volume of 20  $\mu$ L. The resulting cDNA was diluted 1:156 in the final reaction volume. Relative quantities were calculated using the delta delta Ct method, and are given to relative liver which is normalized to an arbitrary value of 1,000,000. Relative quantities are reported as the mean +/- standard deviation for each tissue.

| Tissue       | ApoF Ct     | B-Actin     | Relative Quantity         |
|--------------|-------------|-------------|---------------------------|
| Brain        | 36.2        | 21.9        | 210 +/- 156               |
| Heart        | 36.0        | 24.3        | 1815 +/- 2204             |
| Lung         | 36.1        | 22.3        | 295 +/- 221               |
| <b>Liver</b> | <b>25.5</b> | <b>23.7</b> | <b>1000000 +/- 467242</b> |
| Spleen       | 36.4        | 23.5        | 479 +/- 276               |
| Kidney       | 36.2        | 24.8        | 3295 +/- 4758             |
| Duodenum     | 38.0        | 22.3        | 94 +/- 98                 |
| Jejunum      | 39.1        | 22.0        | 54 +/- 75                 |
| Ileum        | 36.8        | 20.4        | 106 +/- 160               |
| Inguinal Fat | 36.3        | 24.9        | 1140 +/- 862              |
| Brown Fat    | 37.1        | 26.0        | 1812 +/- 1259             |
| Adrenals     | 31.5        | 22.1        | 5634 +/- 3241             |
| Thyroid      | 36.2        | 22.8        | 328 +/- 115               |
| Ovaries      | 33.5        | 21.6        | 1784 +/- 2450             |
